# Supplementary material for: Autophagy proteins regulate innate immune responses by inhibiting the release of mitochondrial DNA mediated by the NALP3 inflammasome
Source: Springer Nature journal article supplement (doi:10.1038/ni.1980), 2010-12-12
Supplement: 41590_2011_BFni1980_MOESM1_ESM.pdf [file 41590_2011_BFni1980_MOESM1_ESM.pdf]

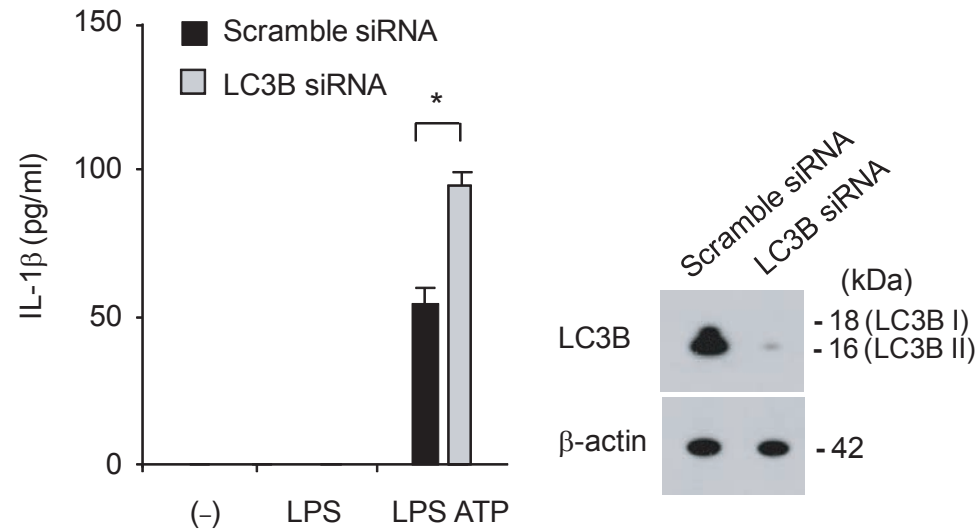

**fig. S1 Gene silencing of LC3B by siRNA enhances IL-1 $\beta$  secretion.** Peritoneal macrophages treated with siRNA against LC3B were incubated with LPS and then stimulated with ATP. Supernatants were analyzed by ELISA for IL-1 $\beta$  secretion. Protein levels of LC3B were analyzed by SDS-PAGE. Data are representative of three determinations per treatment group (mean and s.d.). Figure is representative of three independent experiments. Statistical significance was determined by the Student's *t*-test. \**P* < 0.05.

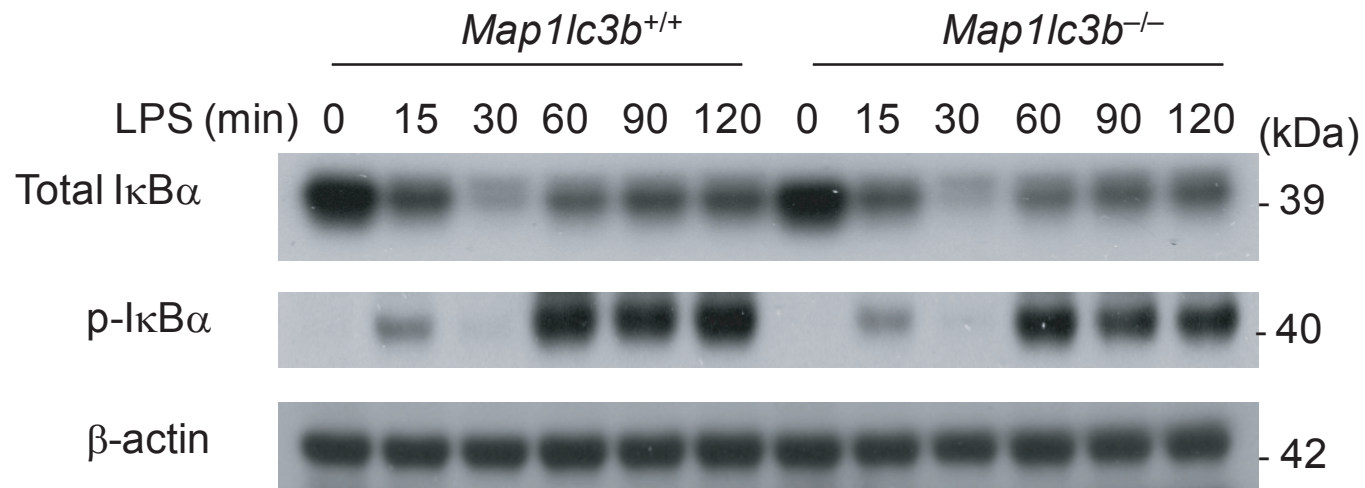

**fig. S2 Absence of LC3B does not affect NF-κB signaling by LPS stimulation.**

BMDM from *Map1lc3b<sup>+/+</sup>* mice or *Map1lc3b<sup>-/-</sup>* mice were treated with LPS (10 ng/ml) and cells were harvested at indicated time points. Cell lysates were analyzed by immunoblotting for total IκB-α and phosphorylated IκB-α. Data are representative of three experiments.

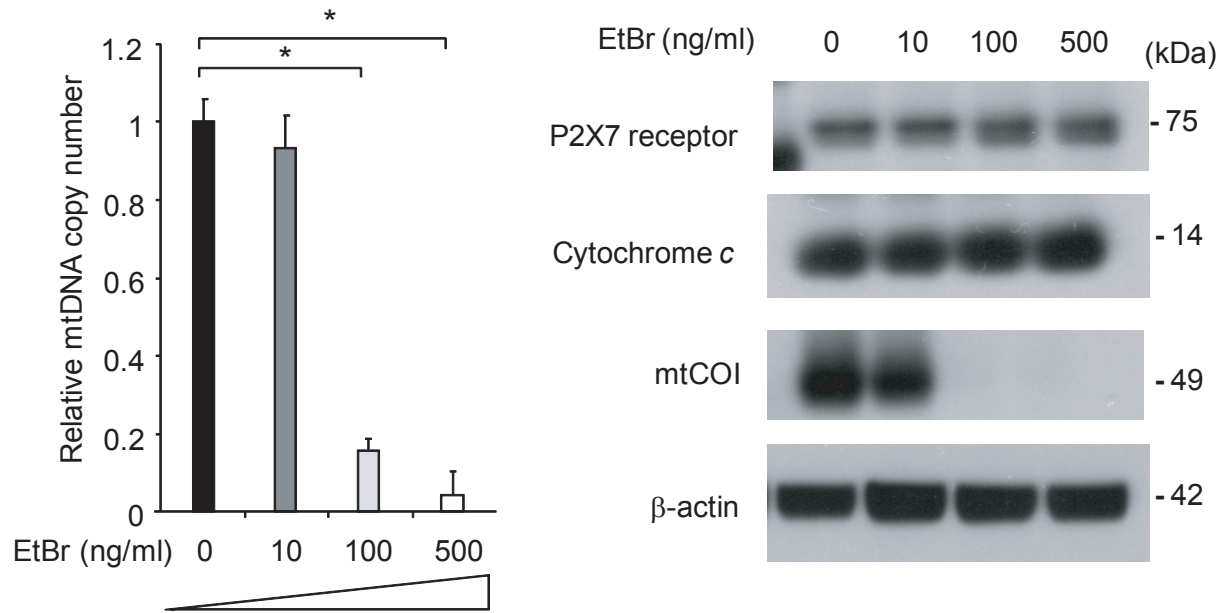

**fig. S3 EtBr treatment depleted mtDNA in macrophages** J774A.1 macrophages were exposed to EtBr at indicated doses. Total mtDNA copy number was measured by quantitative PCR. Cell lysates were analyzed by immunoblotting for mtCOI and cytochrome *c*. Statistical significance was determined by the Student's *t*-test. \* $P < 0.05$ . Data are representative of three experiments (mean and s.d.).

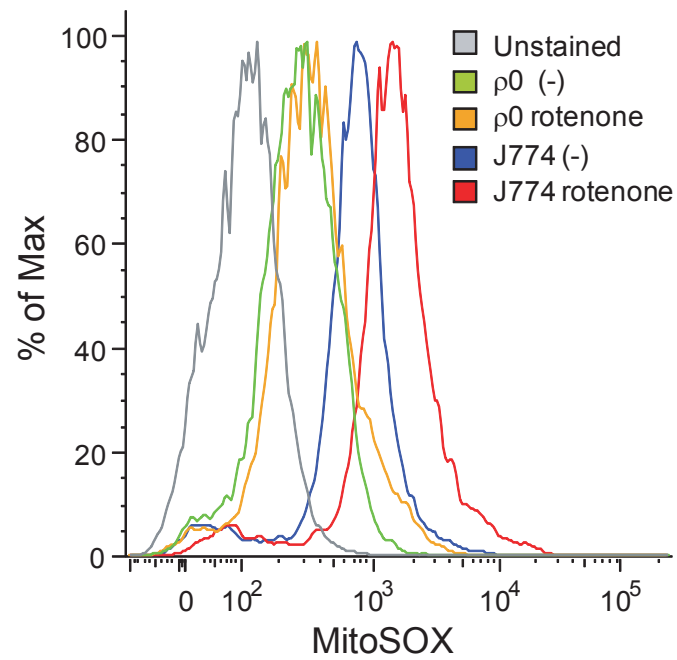

**fig. S4 Mitochondrial ROS generation is impaired in  $\rho^0$  macrophages. J774A.1** control or  $\rho^0$  macrophages incubated with rotenone (5 mM) for 30 min were labeled with MitoSOX for 15 min. Representative flow cytometry plots are represented. Data are representative of three experiments.

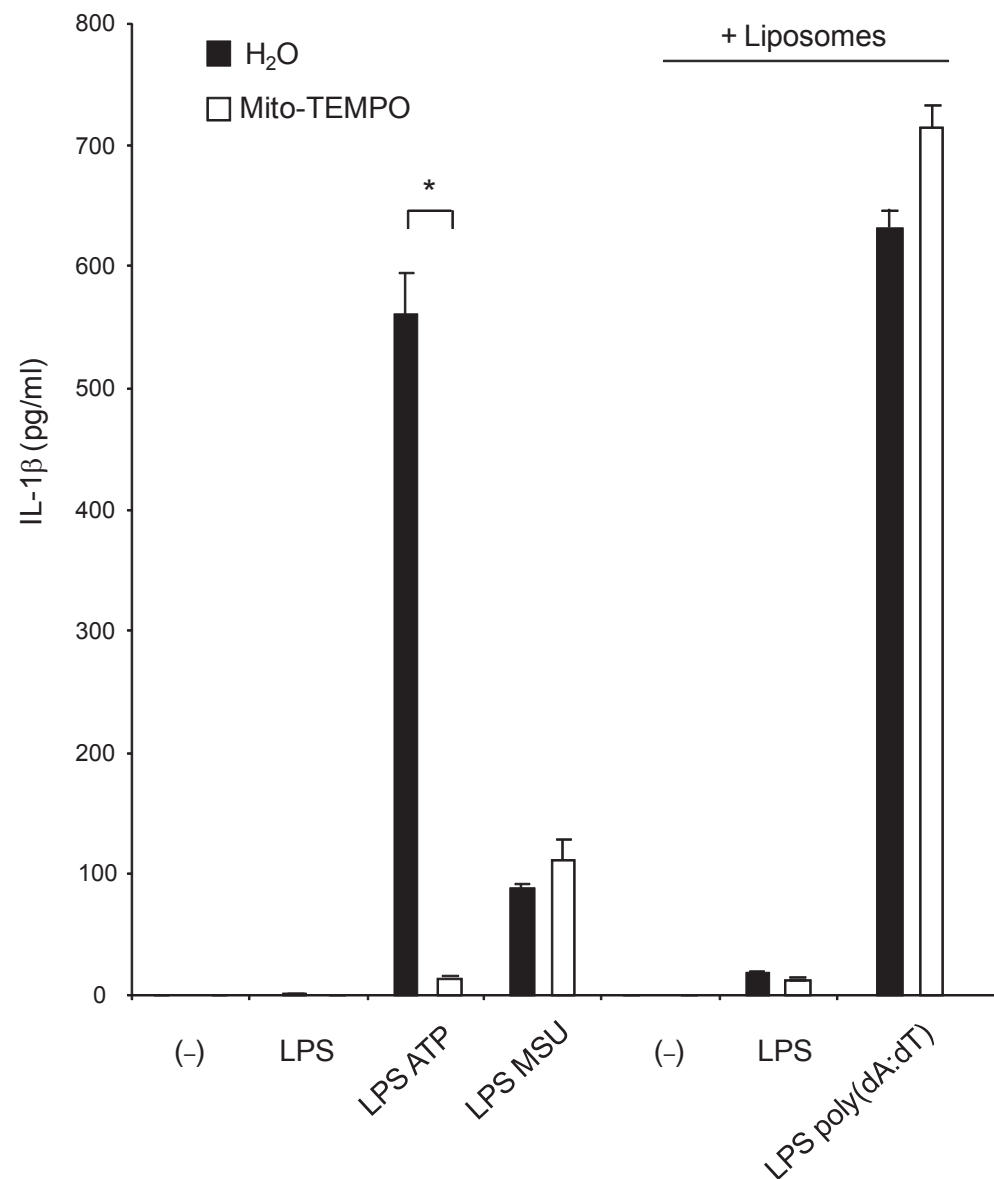

**fig. S5 Differential effect of Mito-TEMPO on IL-1 $\beta$  secretion in macrophages.**

BMDM pre-incubated with Mito-TEMPO (500  $\mu$ M) were incubated with LPS for 4 h, and then stimulated with ATP, MSU or transfected with poly(dA:dT). IL-1 $\beta$  secretion into supernatants was analyzed by ELISA. Statistical significance was determined by the

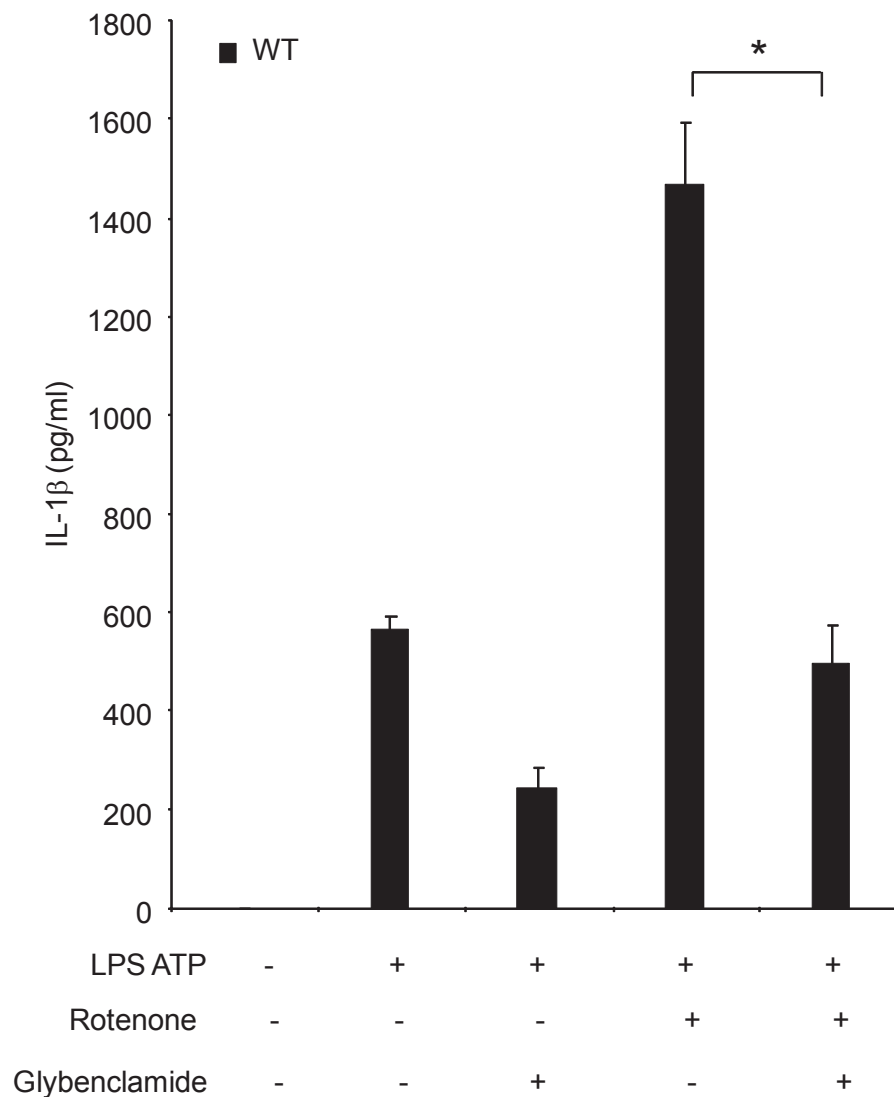

**fig. S6 Glybenclamide treatment abrogated the effect of rotenone on IL-1 $\beta$  secretion**

LPS-primed macrophages were incubated with rotenone in the presence or absence of glybenclamide (100  $\mu$ M), followed by ATP stimulation for 1 h. IL-1 $\beta$  secretion into supernatants was analyzed by ELISA. Statistical significance was determined by the

Student's *t*-test. \**P* < 0.05. Data are representative of three experiments (mean and s.d.).

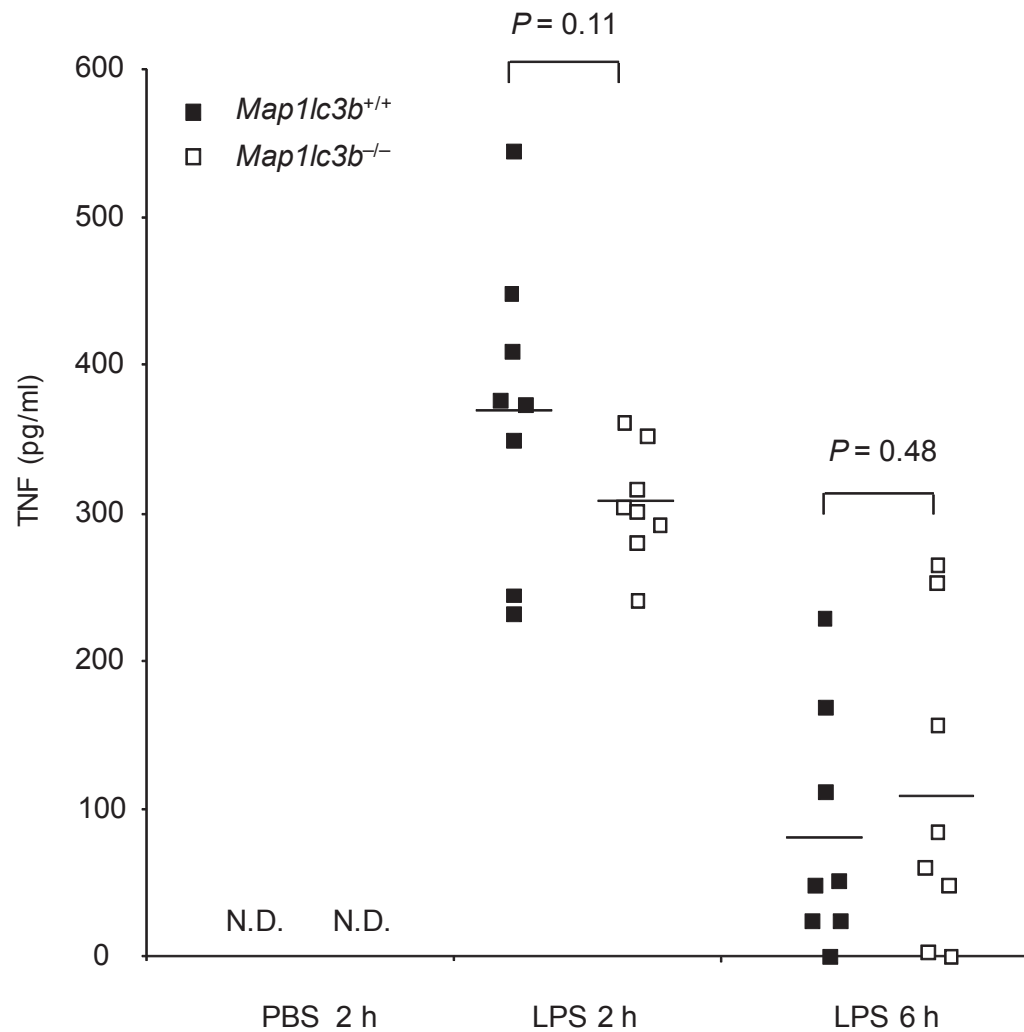

**fig. S7 LC3B deficiency did not affect TNF production in serum after LPS administration.** Male *Map1lc3b*<sup>+/+</sup> mice and *Map1lc3b*<sup>-/-</sup> mice (8-10 weeks of age) were intraperitoneally injected with 12 mg/kg LPS. Serum TNF at 2 and 6 h after injection was analyzed by ELISA. Data are representative of two experiments.

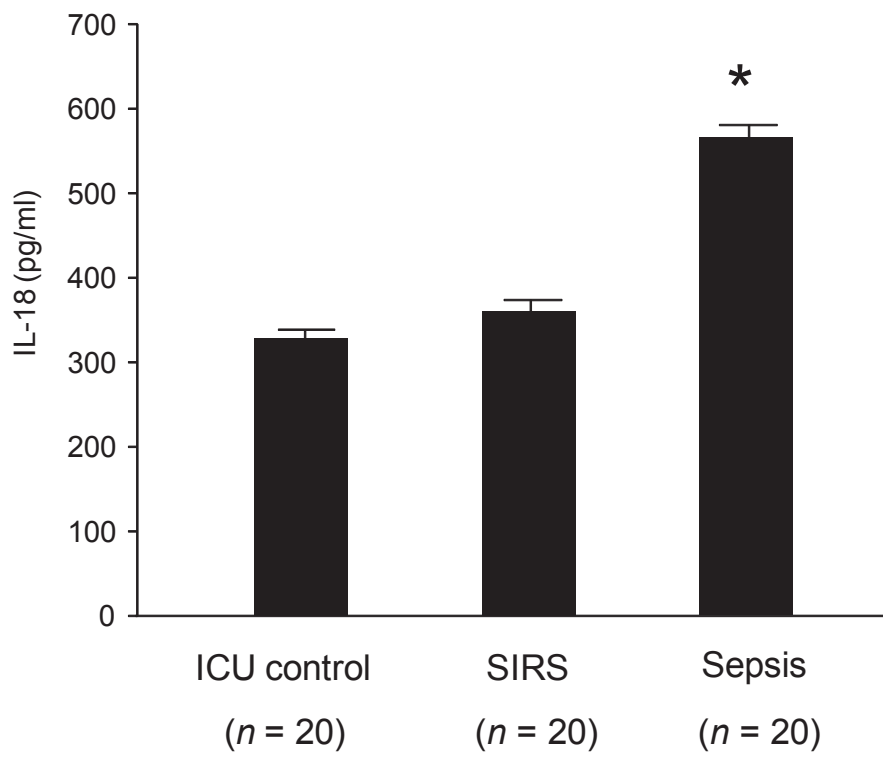

$P = 0.008$  ICU control vs. Sepsis

$P = 0.67$  ICU control vs. SIRS

$P = 0.038$  SIRS vs. Sepsis

**fig. S8 Increased level of IL-18 in plasma from patients with sepsis.** Blood samples were collected from patients with sepsis within 48 hours following medical intensive care units (MICU) hospitalization. IL-18 concentration in plasma was analyzed by ELISA. Statistical analysis was performed by unpaired two-tailed Student's *t*-test.

The Research Registry and Human Sample Repository for the Study of the Biology of Critical Illness (abbreviated name: Registry of Critical Illness (RoCI)) collects demographic, clinical information and blood specimens from patients with critical illness in the medical intensive care unit of the Brigham and Women's Hospital (BWH). RoCI is approved by Partners Human Research Committee and operates under 2008-P-000495 protocol.



| Group   | Age        | Gender | Race     | APACHE II  | LOS     |
|---------|------------|--------|----------|------------|---------|
| Control | 60.8 ±17.7 | 11/9   | 4/0/15/1 | 19.8 ±6.6  | 6 ±4.5  |
| SIRS    | 61.2 ±12.5 | 13/7   | 6/0/13/1 | 21.5 ±10.2 | 14 ±9.8 |
| Sepsis  | 56.7 ±17.5 | 12/8   | 4/1/14/1 | 24.3 ±6.6  | 11 ±6.7 |

Age= mean Age (years) ±SD,

Gender = Male/Female,

Race = Black, non-Hispanic/Asian-Pacific Islander/White non-Hispanic/Hispanic,

APACHE II = Acute Physiology and Chronic Health Evaluation II score,

LOS = length of hospital stay (days) ±SD.

SIRS = Systemic Inflammatory Response Syndrome.

Control; *n* = 20 patients. SIRS; *n* = 20 patients. Sepsis; *n* = 20 patients

**Supplementary Table 1. Demographics and clinical details of patients in the MICU.**

Blood plasma samples were randomly selected from the Brigham and Women's Hospital Medical Intensive Care Unit (MICU), Registry of Critical Illness (RoCI), IRB Protocol number 2008-P-00495. In RoCI, controls are patients without signs of infection; Systemic inflammatory Response Syndrome (SIRS) patients meet at least two criteria for SIRS defined by the [American College of Chest Physicians/ Society of Critical Care Medicine Consensus Conference](#); Sepsis patients have SIRS due to a culture positive infection or significant infection by observation.
